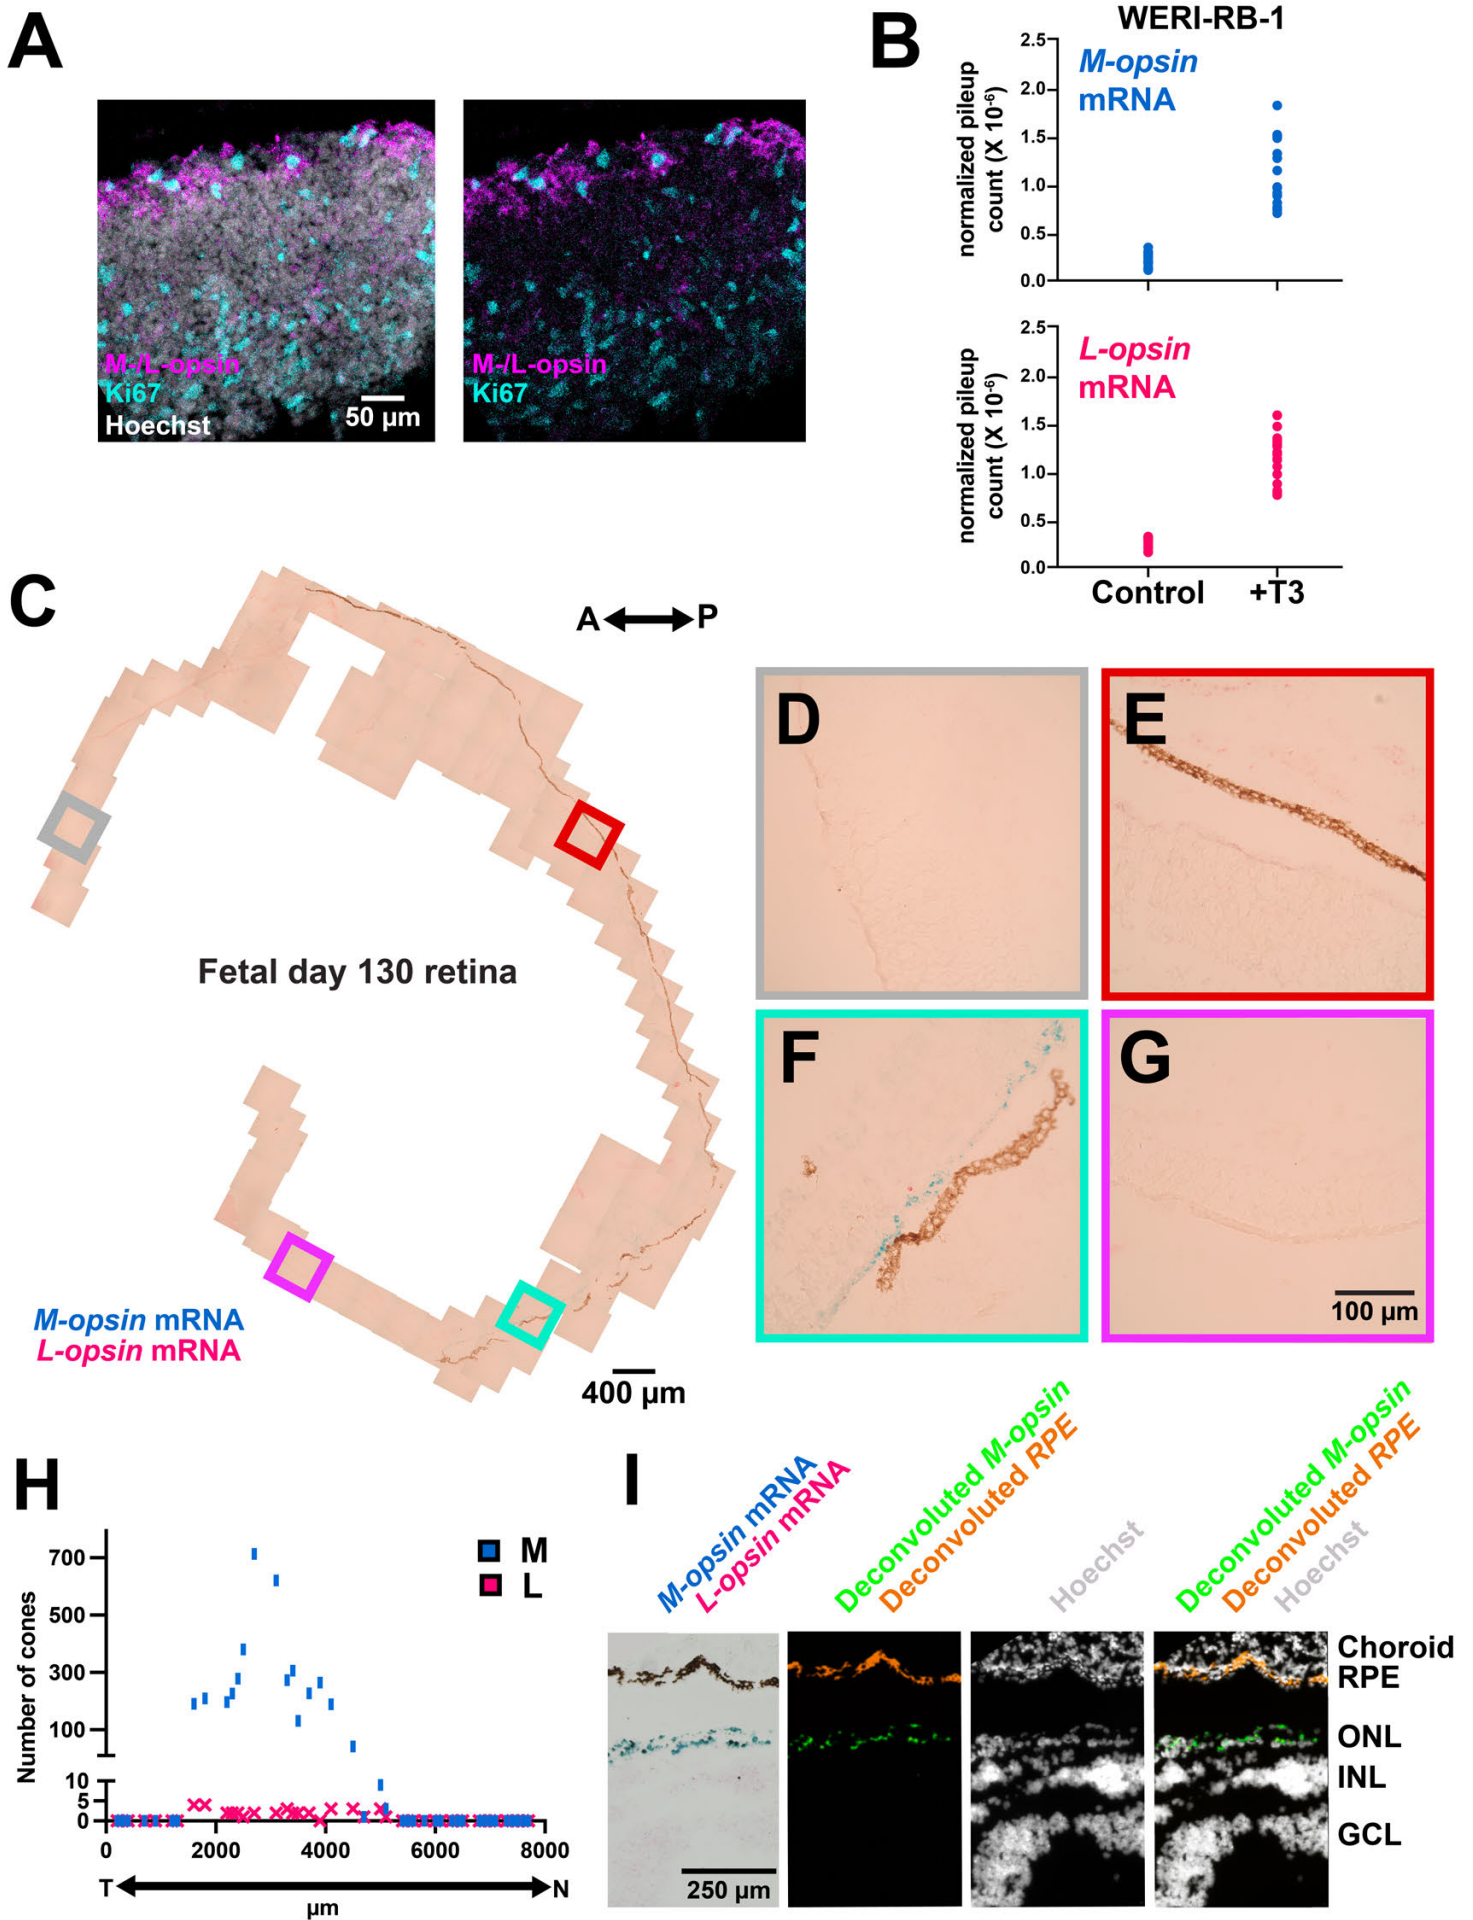

Supplemental Figure 2
